# Supplementary material for: Stage shift and relative survival for head and neck cancer during the 2020 COVID-19 pandemic: a population-based study of temporal trends
Source: PubMed Central journal article supplement (PMC10548264; doi:10.3389/fonc.2023.1253968), 2023-09-20
Supplement: DataSheet_1.pdf [file DataSheet_1.pdf]

## Supplementary Material

### 1 Supplementary Figures and Tables

#### 1.1 Supplementary Figures

Supplemental Figure 1

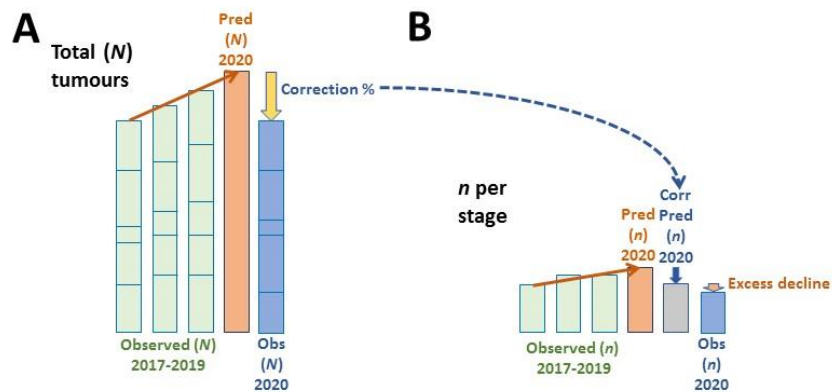

**Supplementary Figure 1. Methodology to calculate predicted incidence and stage shift. (A)** Poisson count model was used to estimate the average yearly change in cancer diagnoses over the period 2015-2019 and extrapolated to 2020. **(B)** For each subgroup, the Poisson count model was applied independently to establish the predicted value for 2020. The predicted value for each subgroup was “corrected” for the percent decline/increase of the total group. Predicted values were compared to observed values for 2020.

Supplemental Figure 2

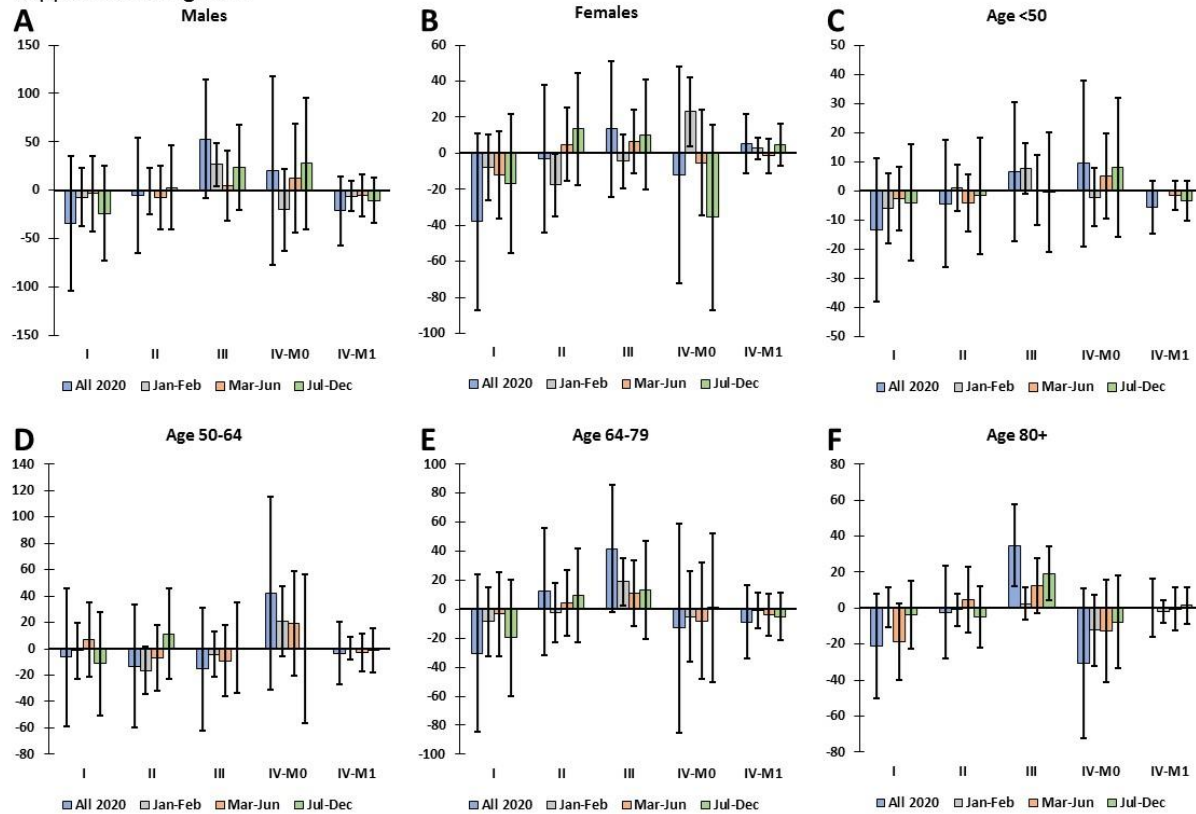

**Supplementary Figure 2. Changes in incidence by clinical stage of head and neck cancer in Belgium in 2020, by sex and age group.** Difference between observed and corrected-predicted incidence in 2020 and by time period for (A) males, (B) females, and patients (C) aged <50, (D) aged 50-64, (E) aged 65-79, and (F) and aged 80+. Difference between predicted-corrected and observed incidence is significant if the 95% confidence interval (error bar) of the difference does not include zero.

**A** Supplemental Figure 3

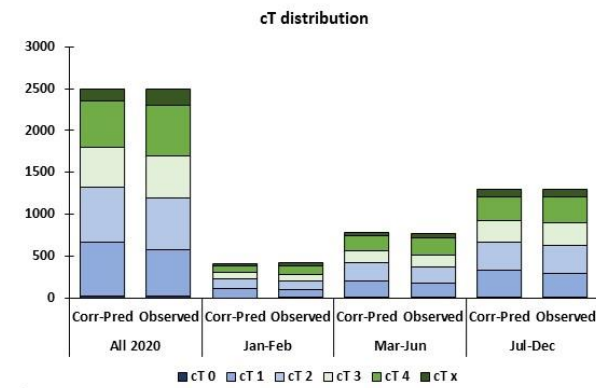

**B**

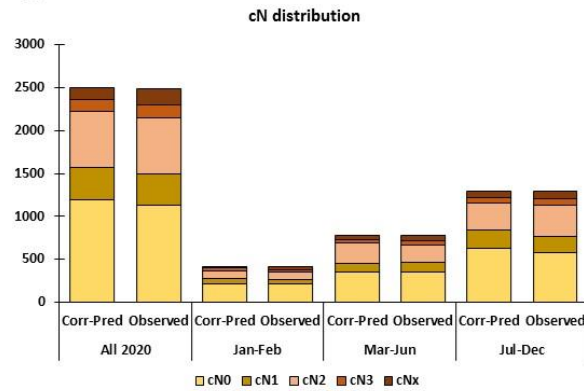

**C**

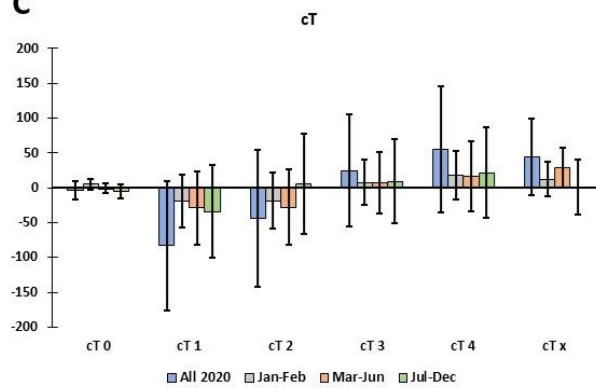

**D**

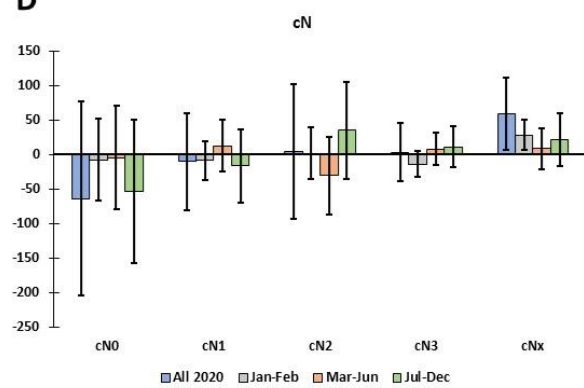

**Supplementary Figure 3. Observed versus corrected-predicted tumor diameter and node involvement.** Clinical (A) T category and (B) N category distribution predictions and observed distributions corrected for incidence decline (Corr-Pred) for head and neck cancer in 2020 and by time period. Difference between observed and corrected-predicted incidence per clinical (C) T category and (D) N category for head and neck cancer in 2020 and by time period. Difference between predicted-corrected and observed incidence is significant if the 95% confidence interval (error bar) of the difference does not include zero.

## 1.2 Supplementary Tables

**Supplementary Table 1. Patient and tumor characteristics.**

|                        | Overall       |               | 2017         |               | 2018         |               | 2019         |               | 2020         |               |
|------------------------|---------------|---------------|--------------|---------------|--------------|---------------|--------------|---------------|--------------|---------------|
|                        | N             | %             | N            | %             | N            | %             | N            | %             | N            | %             |
| <b>Total</b>           | <b>10 582</b> |               | <b>2 671</b> |               | <b>2 692</b> |               | <b>2 728</b> |               | <b>2 491</b> |               |
| <b>Sex</b>             |               |               |              |               |              |               |              |               |              |               |
| Male                   | 7 759         | 73.3          | 1 977        | 74.0          | 1 952        | 72.5          | 2 031        | 74.5          | 1 799        | 72.2          |
| Female                 | 2 823         | 26.7          | 694          | 26.0          | 740          | 27.5          | 697          | 25.5          | 692          | 27.8          |
| <b>Mean Age (SD)</b>   | <b>65</b>     | <b>(11.9)</b> | <b>64</b>    | <b>(11.7)</b> | <b>64</b>    | <b>(11.6)</b> | <b>65</b>    | <b>(11.7)</b> | <b>65</b>    | <b>(11.5)</b> |
| <b>Age group</b>       |               |               |              |               |              |               |              |               |              |               |
| <50 years              | 784           | 7.4           | 203          | 7.6           | 196          | 7.3           | 194          | 7.1           | 191          | 7.7           |
| 50-64 years            | 4 445         | 42.0          | 1 179        | 44.1          | 1 141        | 42.4          | 1 138        | 41.7          | 987          | 39.6          |
| 64-79 years            | 4 161         | 39.3          | 988          | 37.0          | 1 058        | 39.3          | 1 092        | 40.0          | 1 023        | 41.1          |
| 80+ years              | 1 192         | 11.3          | 301          | 11.3          | 297          | 11.0          | 304          | 11.1          | 290          | 11.6          |
| <b>Topography</b>      |               |               |              |               |              |               |              |               |              |               |
| Oral cavity            | 2 796         | 26.4          | 670          | 25.1          | 704          | 26.2          | 761          | 27.9          | 661          | 26.5          |
| Oropharynx             | 3 057         | 28.9          | 787          | 29.5          | 789          | 29.3          | 762          | 27.9          | 719          | 28.9          |
| Hypopharynx            | 1 135         | 10.7          | 300          | 11.2          | 290          | 10.8          | 296          | 10.9          | 249          | 10.0          |
| Larynx                 | 2 197         | 20.8          | 599          | 22.4          | 559          | 20.8          | 541          | 19.8          | 498          | 20.0          |
| Other and Unknown      | 1 397         | 13.2          | 315          | 11.8          | 350          | 13.0          | 368          | 13.5          | 364          | 14.6          |
| <b>Clinical Stage*</b> |               |               |              |               |              |               |              |               |              |               |
| I                      | 1 904         | 20.8          | 395          | 18.2          | 439          | 19.0          | 567          | 23.6          | 503          | 22.3          |
| II                     | 1 514         | 16.6          | 332          | 15.3          | 379          | 16.4          | 406          | 16.9          | 397          | 17.6          |
| III                    | 1 645         | 18.0          | 418          | 19.2          | 430          | 18.6          | 387          | 16.1          | 410          | 18.2          |
| IV-M0                  | 3 586         | 39.2          | 925          | 42.5          | 930          | 40.3          | 907          | 37.8          | 824          | 36.5          |
| IV-M1                  | 490           | 5.4           | 105          | 4.8           | 130          | 5.6           | 134          | 5.6           | 121          | 5.4           |
| X/NA                   | 1 443         | 13.6          | 496          | 18.6          | 384          | 14.3          | 327          | 12.0          | 236          | 9.5           |

\*Percentages for known clinical stage are computed excluding X/NA
